# Supplementary material for: Halogen-bonded tris(2,4-bis(trichloromethyl)-1,3,5-triazapentadienato)-M(iii) [M = Mn, Fe, Co] complexes and their catalytic activity in the peroxidative oxidation of 1-phenylethanol to acetophenone
Source: Royal Society of Chemistry journal article supplement (doi:10.1039/c4nj00797b), 2014-07-21
Supplement: c4nj00797b1.pdf [file c4nj00797b1.pdf]

## Electronic Supplementary Information

### Halogen-bonded *tris*(2,4-*bis*(trichloromethyl)-1,3,5-triazapentadienato)-M(III) [M = Mn, Fe, Co] complexes and their catalytic activity in the peroxidative oxidation of 1-phenylethanol to acetophenone

Namiq Q. Shixaliyev,<sup>a</sup> Atash V. Gurbanov,<sup>a</sup> Abel M. Maharramov,<sup>a</sup>

Kamran T. Mahmudov,<sup>a,b</sup> Maximilian N. Kopylovich,<sup>b,\*</sup> Luísa M. D. R. S. Martins,<sup>b,c,\*</sup>

Vasily M. Muzalevskiy<sup>d</sup>, Valentine G. Nenajdenko,<sup>d</sup> Armando J. L. Pombeiro<sup>b,\*</sup>

<sup>a</sup> Department of Chemistry, Baku State University, Z. Xalilov Str. 23, Az 1148 Baku, Azerbaijan

<sup>b</sup> Centro de Química Estrutural, Instituto Superior Técnico, Universidade de Lisboa, Av. Rovisco Pais, 1049-001 Lisbon, Portugal

<sup>c</sup> Chemical Engineering Department, ISEL, R. Conselheiro Emídio Navarro, 1959-007 Lisbon, Portugal

<sup>d</sup> Department of Chemistry, Moscow State University, Leninskie Gory, Moscow 119992, Russia

\*Corresponding authors:

*E-mail addresses:* kopylovich@yahoo.com (Maximilian N. Kopylovich)

lmartins@deq.isel.ipl.pt (Luísa M. D. R. S. Martins),

pombeiro@tecnico.ulisboa.pt (Armando J. L. Pombeiro)

## X-ray analysis

**Table S1.** Selected distances (Å) and angles (°) of **1–3**

|                   | 1        | 2                 | 3          |
|-------------------|----------|-------------------|------------|
| Mn(1)-N(5)        | 1.949(5) | Fe(1)-N(19)       | 1.912(2)   |
| Mn(1)-N(1)        | 1.952(6) | Fe(1)-N(1)        | 1.916(3)   |
| Mn(1)-N(12)       | 1.956(6) | Fe(1)-N(15)       | 1.916(3)   |
| Mn(1)-N(15)       | 1.962(5) | Fe(1)-N(12)       | 1.936(3)   |
| Mn(1)-N(8)        | 1.963(5) | Fe(1)-N(5)        | 1.937(3)   |
| Mn(1)-N(19)       | 1.966(5) | Fe(1)-N(8)        | 1.947(3)   |
| N(1)-C(2)         | 1.288(8) | N(1)-C(2)         | 1.295(4)   |
| C(2)-N(3)         | 1.366(8) | C(2)-N(3)         | 1.326(5)   |
| N(3)-C(4)         | 1.350(8) | N(3)-C(4)         | 1.321(4)   |
| C(4)-N(5)         | 1.257(8) | C(4)-N(5)         | 1.287(4)   |
| N(8)-C(9)         | 1.272(8) | N(8)-C(9)         | 1.280(4)   |
| N(5)-Mn(1)-N(1)   | 85.0(2)  | C(9)-N(10)        | 1.320(5)   |
| N(5)-Mn(1)-N(12)  | 90.6(2)  | N(19)-Fe(1)-N(1)  | 91.30(11)  |
| N(1)-Mn(1)-N(12)  | 172.0(2) | N(19)-Fe(1)-N(15) | 88.61(11)  |
| N(5)-Mn(1)-N(15)  | 173.4(2) | N(1)-Fe(1)-N(15)  | 91.08(12)  |
| N(1)-Mn(1)-N(15)  | 89.7(2)  | N(19)-Fe(1)-N(12) | 92.17(12)  |
| N(12)-Mn(1)-N(15) | 95.0(2)  | N(1)-Fe(1)-N(12)  | 176.09(11) |
| N(5)-Mn(1)-N(8)   | 96.8(2)  | N(15)-Fe(1)-N(12) | 90.81(12)  |
| N(1)-Mn(1)-N(8)   | 89.2(2)  | N(19)-Fe(1)-N(5)  | 87.28(11)  |
| N(12)-Mn(1)-N(8)  | 84.7(2)  | N(1)-Fe(1)-N(5)   | 87.13(12)  |
| N(15)-Mn(1)-N(8)  | 87.1(2)  | N(15)-Fe(1)-N(5)  | 175.48(11) |
| N(5)-Mn(1)-N(19)  | 90.2(2)  | N(12)-Fe(1)-N(5)  | 91.24(12)  |
| N(1)-Mn(1)-N(19)  | 98.7(2)  | N(19)-Fe(1)-N(8)  | 177.27(12) |
| N(12)-Mn(1)-N(19) | 88.0(2)  | N(1)-Fe(1)-N(8)   | 90.30(12)  |
| N(15)-Mn(1)-N(19) | 86.6(2)  | N(15)-Fe(1)-N(8)  | 89.15(11)  |
| N(8)-Mn(1)-N(19)  | 169.9(2) | N(12)-Fe(1)-N(8)  | 86.30(12)  |
|                   |          | N(5)-Fe(1)-N(8)   | 95.01(12)  |
|                   |          | N(8)-Co(1)-N(15)  | 90.52(18)  |
|                   |          | N(12)-Co(1)-N(1)  | 91.6(2)    |
|                   |          | N(12)-Co(1)-N(5)  | 178.00(18) |
|                   |          | N(1)-Co(1)-N(5)   | 88.6(2)    |
|                   |          | N(12)-Co(1)-N(19) | 87.67(17)  |
|                   |          | N(1)-Co(1)-N(19)  | 91.3(2)    |
|                   |          | N(5)-Co(1)-N(19)  | 94.31(18)  |
|                   |          | N(12)-Co(1)-N(8)  | 88.57(17)  |
|                   |          | N(1)-Co(1)-N(8)   | 89.79(19)  |
|                   |          | N(5)-Co(1)-N(8)   | 89.44(17)  |
|                   |          | N(19)-Co(1)-N(8)  | 176.12(16) |
|                   |          | N(12)-Co(1)-N(15) | 90.26(19)  |
|                   |          | N(1)-Co(1)-N(15)  | 178.10(19) |
|                   |          | N(5)-Co(1)-N(15)  | 89.5(2)    |
|                   |          | N(19)-Co(1)-N(15) | 88.5(2)    |

Symmetry transformations used to generate equivalent atoms: #1 -x,-y+2,-z+1

**Table S2.** Hydrogen bond interactions in **1–3** (Å, °).

| Compound | D-H...A                             | Distances (Å) |         |          | Angles (°) |
|----------|-------------------------------------|---------------|---------|----------|------------|
|          |                                     | D-H           | H...A   | D...A    | D-H...A    |
| 1        | N(1)-H(1)...O(1)                    | 0.88          | 2.30    | 2.907(6) | 126        |
|          | N(15)-H(15)...O(1)                  | 0.88          | 2.30    | 2.940(6) | 130        |
|          | N(8)-H(8)...O(1)                    | 0.88          | 2.57    | 2.990(6) | 110        |
|          | N(26)-H(26)...O(2)#1 <sup>i</sup>   | 0.88          | 2.16    | 2.874(6) | 137        |
|          | N(40)-H(40)...O(2)#1 <sup>i</sup>   | 0.88          | 2.23    | 2.866(6) | 129        |
|          | N(50)-H(50)...O(3)#2 <sup>ii</sup>  | 0.88          | 2.33    | 2.968(7) | 129        |
|          | N(61)-H(61)...O(3)#2 <sup>ii</sup>  | 0.88          | 2.40    | 2.986(7) | 125        |
|          | N(75)-H(75)...O(4)                  | 0.88          | 2.27    | 2.876(6) | 126        |
| 2        | N(82)-H(82)...O(4)                  | 0.88          | 2.33    | 2.986(6) | 132        |
|          | N(1)-H(1)...O(2')#1 <sup>iii</sup>  | 0.86          | 2.20    | 2.946(4) | 145        |
|          | N(1)-H(1)...O(2)#1 <sup>iii</sup>   | 0.86          | 2.36    | 3.117(5) | 147        |
|          | N(12)-H(12)...O(1)#2 <sup>iv</sup>  | 0.86          | 2.15    | 2.941(4) | 153        |
|          | N(12)-H(12)...O(1')#2 <sup>iv</sup> | 0.86          | 2.21    | 2.954(5) | 144        |
|          | N(15)-H(15)...O(2)#1 <sup>iii</sup> | 0.86          | 2.64    | 3.066(4) | 112        |
| 3        | N(19)-H(19)...O(1')#2 <sup>iv</sup> | 0.86          | 2.37    | 2.948(5) | 125        |
|          | N(19)-H(19)...O(1)#2 <sup>iv</sup>  | 0.86          | 2.54    | 3.061(5) | 120        |
|          | N(15)-H(15)...O(2)                  | 0.89(4)       | 2.35(6) | 3.062(7) | 137(7)     |
|          | N(1)-H(1)...O(3)                    | 0.90(4)       | 2.43(6) | 2.997(7) | 121(5)     |
|          | N(12)-H(12)...O(3)                  | 0.89(4)       | 2.53(6) | 3.009(7) | 115(5)     |
|          | N(8)-H(8)...O(2)                    | 0.89(4)       | 2.61(7) | 3.057(8) | 112(6)     |
|          | N(19)-H(19)...O(3)                  | 0.89(4)       | 2.52(7) | 3.194(8) | 133(7)     |

Symmetry transformations used to generate equivalent atoms: (i) #1 x,y,z-1; (ii) #2 x,y-1,z; (iii) #1 -x+1,-y,-z+1; (iv) #2 -x+1,-y+1,-z+1.

**Table S3.** Cl...Cl interactions in **1–3**.

| <b>1</b>      |               |               |               |                  |
|---------------|---------------|---------------|---------------|------------------|
| <b>Atom 1</b> | <b>Atom 2</b> | <b>Length</b> | <b>SumRad</b> | <b>Symm. op.</b> |
| *Cl(7A)       | Cl(34)        | 3.204(4)      | << 3.50       | 1+x,y,1+z        |
| Cl(55)        | Cl(15)        | 3.445(4)      | < 3.50        | x,1+y,z          |
| Cl(57)        | Cl(31)        | 3.300(3)      | << 3.50       | x,y,1+z          |
| *Cl(70)       | Cl(5)         | 3.133(3)      | << 3.50       | x,y,-1+z         |
| *Cl(70)       | Cl(38)        | 3.434(4)      | < 3.50        | x,1+y,z          |
| Cl(1)         | Cl(19)        | 3.454(3)      | < 3.50        | 1+x,y,1+z        |
| Cl(5)         | *Cl(70)       | 3.133(3)      | << 3.50       | x,y,1+z          |
| Cl(6)         | Cl(45)        | 3.431(3)      | < 3.50        | x,y,1+z          |
| Cl(24)        | Cl(44)        | 3.388(3)      | < 3.50        | -1+x,1+y,z       |
| Cl(26)        | Cl(44)        | 3.464(3)      | < 3.50        | -1+x,1+y,z       |
| Cl(31)        | Cl(57)        | 3.300(3)      | << 3.50       | x,y,-1+z         |
| Cl(34)        | *Cl(7A)       | 3.204(4)      | << 3.50       | -1+x,y,-1+z      |
| Cl(36)        | Cl(51)        | 3.181(3)      | << 3.50       | -1+x,y,-1+z      |
| Cl(38)        | *Cl(70)       | 3.434(4)      | < 3.50        | x,-1+y,z         |
| Cl(44)        | Cl(24)        | 3.388(3)      | < 3.50        | 1+x,-1+y,z       |
| Cl(44)        | Cl(26)        | 3.464(3)      | < 3.50        | 1+x,-1+y,z       |
| Cl(45)        | Cl(6)         | 3.431(3)      | < 3.50        | x,y,-1+z         |
| Cl(51)        | Cl(36)        | 3.181(3)      | << 3.50       | 1+x,y,1+z        |
| N(38)         | Cl(7)         | 3.221(6)      | < 3.30        | -1+x,y,-1+z      |
| N(3)          | Cl(30)        | 3.225(6)      | < 3.30        | x,-1+y,1+z       |
| Cl(7)         | N(38)         | 3.221(6)      | < 3.30        | 1+x,y,1+z        |
| Cl(30)        | N(3)          | 3.225(6)      | < 3.30        | x,1+y,-1+z       |
| *Cl(7A)       | Cl(34)        | 3.204(4)      | << 3.50       | 1+x,y,1+z        |
| Cl(57)        | Cl(31)        | 3.300(3)      | << 3.50       | x,y,1+z          |
| *Cl(70)       | Cl(5)         | 3.133(3)      | << 3.50       | x,y,-1+z         |
| Cl(5)         | *Cl(70)       | 3.133(3)      | << 3.50       | x,y,1+z          |
| Cl(31)        | Cl(57)        | 3.300(3)      | << 3.50       | x,y,-1+z         |
| Cl(34)        | *Cl(7A)       | 3.204(4)      | << 3.50       | -1+x,y,-1+z      |
| Cl(36)        | Cl(51)        | 3.181(3)      | << 3.50       | -1+x,y,-1+z      |
| Cl(51)        | Cl(36)        | 3.181(3)      | << 3.50       | 1+x,y,1+z        |
| <b>2</b>      |               |               |               |                  |
| Cl(4)         | Cl(4)         | 3.155(2)      | << 3.50       | 1-x,-y,1-z       |
| Cl(8)         | Cl(12)        | 3.433(3)      | < 3.50        | 2-x,-y,-z        |
| Cl(12)        | Cl(8)         | 3.433(3)      | < 3.50        | 2-x,-y,-z        |
| Cl(9)         | Cl(9)         | 3.430(2)      | < 3.50        | 1-x,-y,-z        |
| Cl(9)         | Cl(15)        | 3.486(2)      | < 3.50        | 1-x,-y,-z        |
| Cl(15)        | Cl(9)         | 3.486(2)      | < 3.50        | 1-x,-y,-z        |
| Cl(10)        | Cl(14)        | 3.485(2)      | < 3.50        | 1-x,-y,-z        |
| Cl(14)        | Cl(10)        | 3.485(2)      | < 3.50        | 1-x,-y,-z        |
| Cl(14)        | Cl(14)        | 3.488(2)      | < 3.50        | -x,1-y,-z        |
| <b>3</b>      |               |               |               |                  |
| Cl(1)         | Cl(7)         | 3.490(5)      | < 3.50        | -x,-y,1-z        |
| Cl(7)         | Cl(1)         | 3.490(5)      | < 3.50        | -x,-y,1-z        |
| Cl(2)         | Cl(5)         | 3.437(5)      | < 3.50        | -1-x,1-y,1-z     |
| Cl(5)         | Cl(2)         | 3.437(5)      | < 3.50        | -1-x,1-y,1-z     |
| Cl(4)         | Cl(4)         | 3.436(4)      | < 3.50        | -x,1-y,1-z       |
| Cl(4)         | Cl(8)         | 3.484(3)      | < 3.50        | -x,1-y,1-z       |
| Cl(8)         | Cl(4)         | 3.484(3)      | < 3.50        | -x,1-y,1-z       |
| Cl(7)         | Cl(7)         | 3.374(4)      | < 3.50        | 1-x,-y,1-z       |
| Cl(9)         | Cl(18)        | 3.459(4)      | < 3.50        | 1+x,y,z          |
| Cl(18)        | Cl(9)         | 3.459(4)      | < 3.50        | -1+x,y,z         |
| Cl(16)        | Cl(16)        | 3.178(4)      | << 3.50       | -x,-y,-z         |
